# Supplementary material for: Plant bio-inspired laminar cellulose-based foam with flame retardant, thermal insulation and excellent mechanical properties
Source: Royal Society of Chemistry journal article supplement (doi:10.1039/d2ta07646b), 2022-11-30
Supplement: d2ta07646b1.pdf [file d2ta07646b1.pdf]

## Supporting Information

### **Plant bio-inspired laminar cellulose-based foam with flame retardancy, thermally insulating and excellent mechanical properties**

Yansu Hou<sup>a</sup>, Jianming Liao<sup>a, \*</sup>, Luyao Huang<sup>a</sup>, Shasha Guo<sup>a</sup>, Yuxiang Zhang<sup>a</sup>, Zhan

Liu<sup>a</sup>, Lihuan Mo<sup>a</sup>, Xi Zhang<sup>a, b</sup>, Jun Li<sup>a, \*</sup>

#### Figures

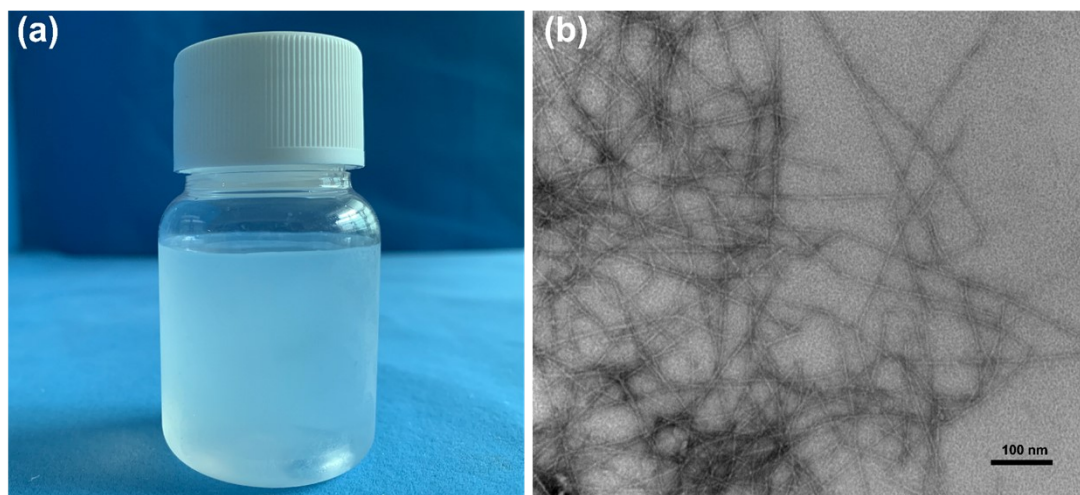

**Fig. S1** (a) The optical photograph. (b) TEM image of CNF solution.

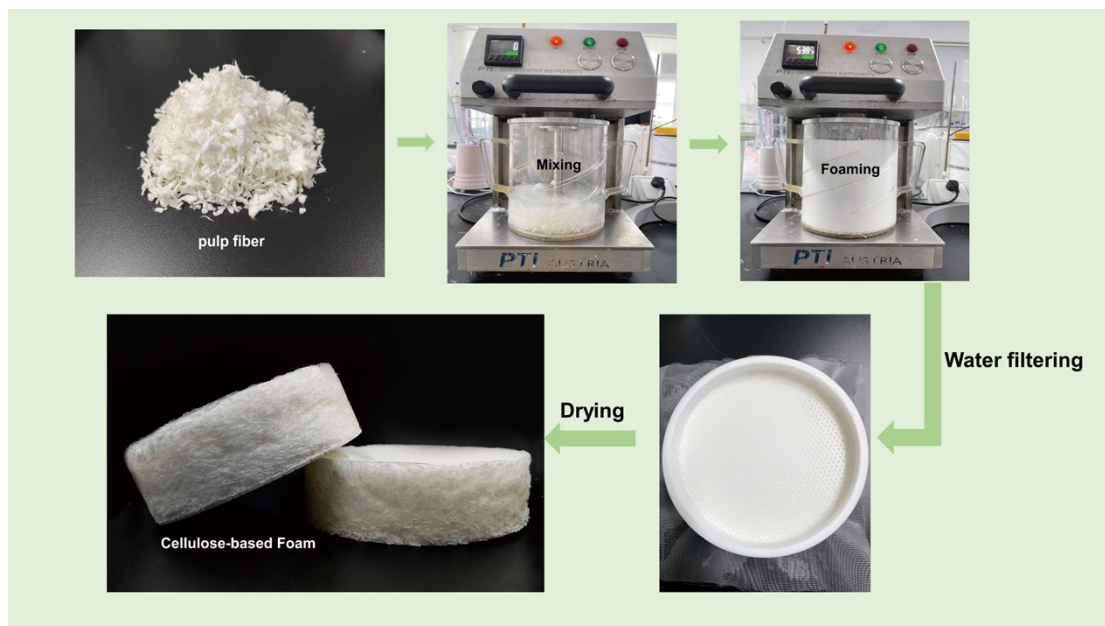

**Fig. S2** Schematic diagram of the procedure for the fabrication of cellulose-based foams

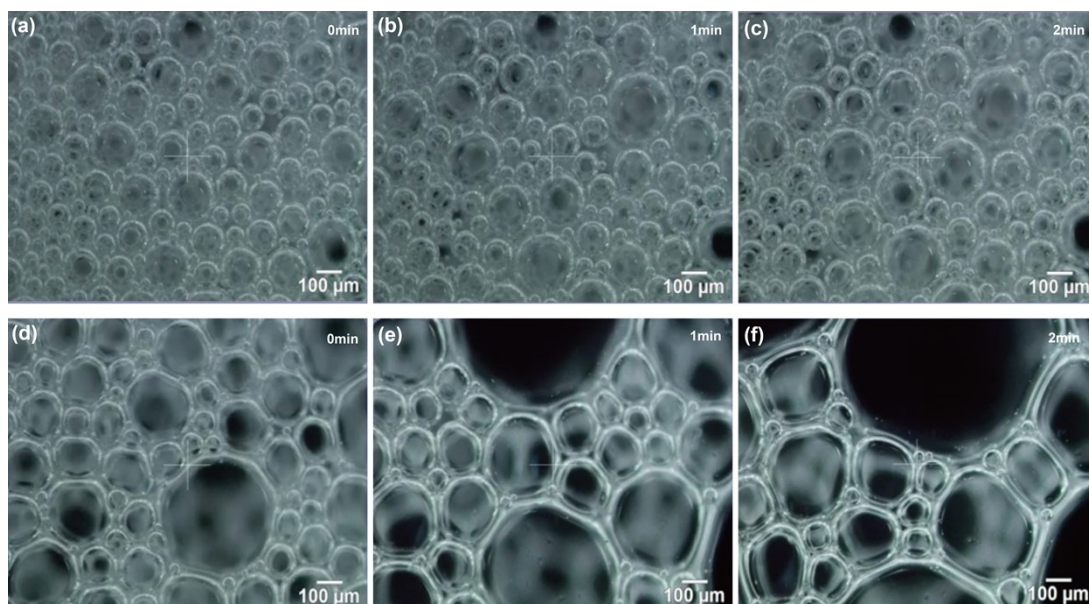

**Fig. S3** Optical microscope images in (a-c) CNF-containing bubbles and (d-f) pure SDS solutions of bubbles at different times.

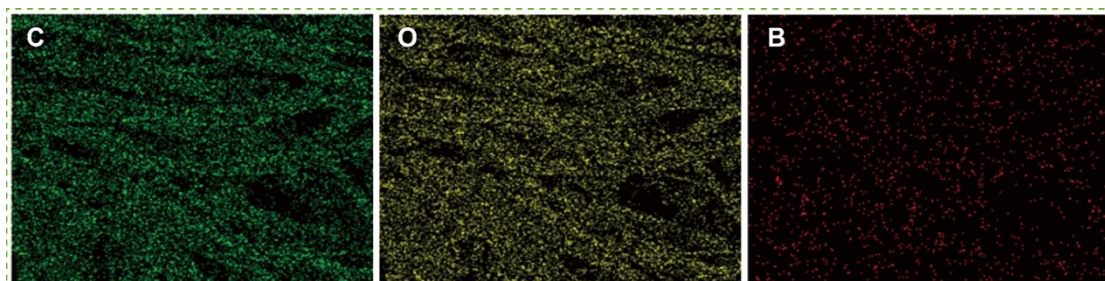

**Fig. S4** X-ray energy spectra (EDS) of the foam after borate cross-linking.

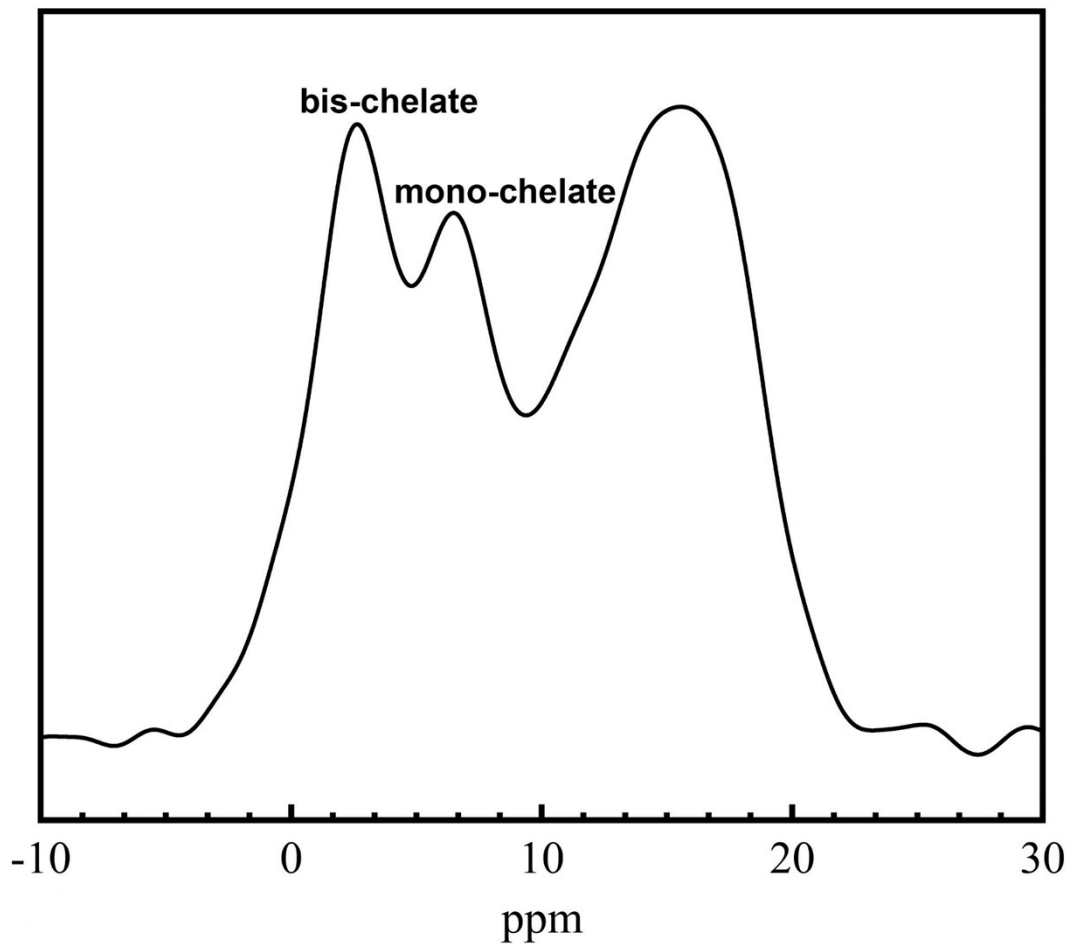

**Fig. S5**  $^{11}\text{B}$  MAS NMR spectrum of cellulose-based foam

### Tables

**Table S1** The density and porosity of PF, PCF-0, and PCF-0.12 samples.

| Sample   | Density ( $\text{mg}/\text{cm}^3$ ) | Porosity (%) |
|----------|-------------------------------------|--------------|
| PF       | 12.1                                | 99.2         |
| PCF-0    | 12.2                                | 99.2         |
| PCF-0.12 | 13.2                                | 99.1         |

**Table S2** The analytical results of XPS elemental determination of PF and PCF-0 samples.

| Sample | C (%) | O (%) | B (%) |
|--------|-------|-------|-------|
| PF     | 62.8  | 35.5  | 1.0   |
| PCF-0  | 63.4  | 34.2  | 1.9   |

**Table S3** Combustion parameters of PF, PCF-0, and PCF-0.12.

| Sample   | PHRR<br>(kW/m <sup>2</sup> ) | THR<br>(MJ/m <sup>2</sup> ) | FGI<br>(kW/m <sup>2</sup> ·s) | LOI<br>(%) |
|----------|------------------------------|-----------------------------|-------------------------------|------------|
| PF       | 154.5                        | 12.04                       | 9.09                          | 16.1       |
| PCF-0    | 91.8                         | 5.77                        | 4.59                          | 23.0       |
| PCF-0.12 | 65.9                         | 5.80                        | 5.07                          | 23.5       |
